# Supplementary material
Source: PubMed Central journal article supplement (PMC3082641)
Supplement: 12192_2009_151_MOESM1_ESM.pdf [file 12192_2009_151_MOESM1_ESM.pdf]

# The pivotal role of the $\beta 7$ strand in the intersubunit contacts of different human small heat shock proteins

## Cell Stress and Chaperones

Evgeny V. Mymrikov, Olesya V. Bukach, Alim S. Seit-Nebi and Nikolai B. Gusev

Corresponding author: Nikolai B. Gusev, Department of Biochemistry,  
School of Biology, Moscow State University, Moscow 119991, Russian Federation  
Tel/Fax 7-495-939-2747; E-mail NBGusev@mail. ru

### Online Resource 1

Table 1. Estimation of different elements of the secondary structure of human small heat shock proteins and their Cys-mutants from the data of far UV CD by CONTINLL subprogram of Sreerama and Woody (Sreerama and Woody 2000).

| Structure Protein                   | $\alpha$ -Helix |           | $\beta$ -strand |           | Turns | Unordered |
|-------------------------------------|-----------------|-----------|-----------------|-----------|-------|-----------|
|                                     | Regular         | Distorted | Regular         | Distorted |       |           |
| Wild type $\alpha$ B-crystallin     | 0.02            | 0.05      | 0.23            | 0.13      | 0.23  | 0.35      |
| Cys mutant of $\alpha$ B-crystallin | 0.02            | 0.05      | 0.23            | 0.13      | 0.23  | 0.35      |
| Wild type HspB6                     | 0.03            | 0.06      | 0.23            | 0.13      | 0.22  | 0.34      |
| Cys-mutant of HspB6                 | 0.03            | 0.06      | 0.24            | 0.13      | 0.22  | 0.33      |
| Wild type HspB8                     | 0.02            | 0.05      | 0.23            | 0.13      | 0.22  | 0.35      |
| Cys-mutant of HspB8                 | 0.02            | 0.05      | 0.23            | 0.13      | 0.22  | 0.35      |
