# Supplementary material
Source: PubMed Central journal article supplement (PMC3082641)
Supplement: 12192_2009_151_MOESM2_ESM.pdf [file 12192_2009_151_MOESM2_ESM.pdf]

# The pivotal role of the $\beta 7$ strand in the intersubunit contacts of different human small heat shock proteins

## Cell Stress and Chaperones

Evgeny V. Mymrikov, Olesya V. Bukach, Alim S. Seit-Nebi and Nikolai B. Gusev

Corresponding author: Nikolai B. Gusev, Department of Biochemistry,  
School of Biology, Moscow State University, Moscow 119991, Russian Federation  
Tel/Fax 7-495-939-2747; E-mail NBGusev@mail.ru

Online Resource 2

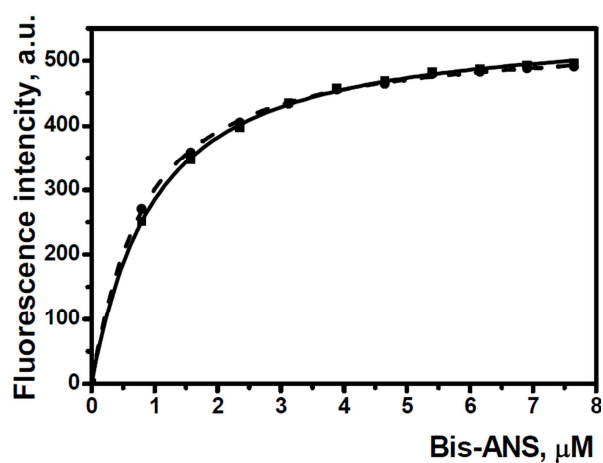

Titration of the wild type  $\alpha$ B-crystallin (solid line) and its Cys-mutant (dashed line) with bis-ANS. The concentration of  $\alpha$ B-crystallin (per monomer) was equal to 0.64  $\mu$ M. The fluorescence was excited at 385 and recorded at 495 nm.
