# Supplementary material
Source: PubMed Central journal article supplement (PMC3082641)
Supplement: 12192_2009_151_MOESM3_ESM.pdf [file 12192_2009_151_MOESM3_ESM.pdf]

# The pivotal role of the $\beta 7$ strand in the intersubunit contacts of different human small heat shock proteins

## Cell Stress and Chaperones

Evgeny V. Mymrikov, Olesya V. Bukach, Alim S. Seit-Nebi and Nikolai B. Gusev

Corresponding author: Nikolai B. Gusev, Department of Biochemistry, School of Biology, Moscow State University, Moscow 119991, Russian Federation  
Tel/Fax 7-495-939-2747; E-mail NBGusev@mail. Ru

Online Resource 3

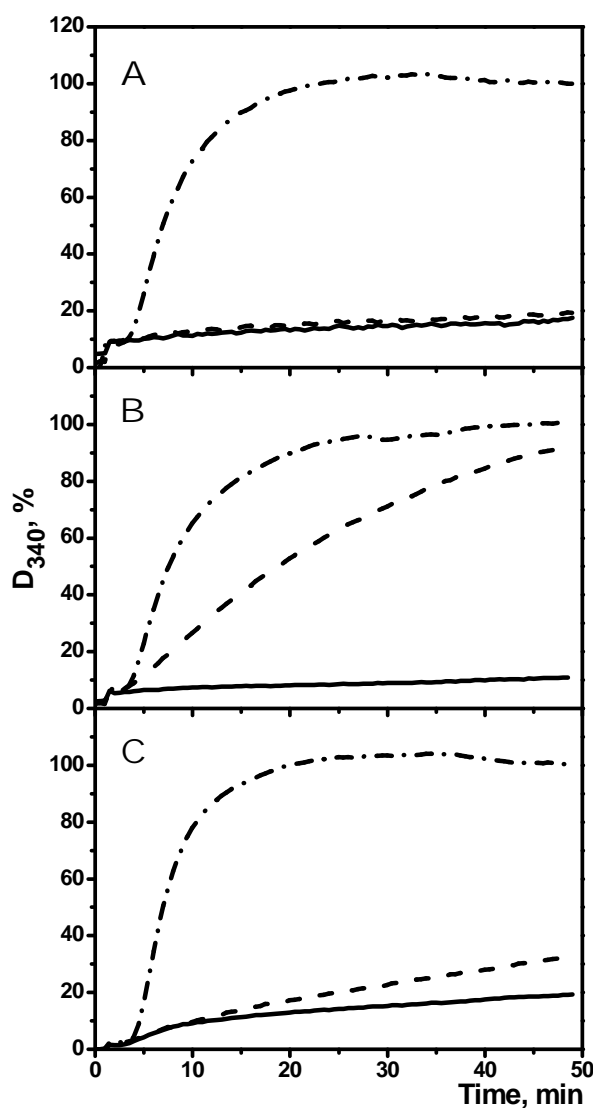

Chaperone-like activity of  $\alpha$ B-crystallin (A), HspB6 (B) and HspB8 (C) measured by their ability to affect reduction-induced aggregation of insulin. Aggregation of insulin was induced by addition of dithiothreitol up to the final concentration 24 mM and was recorded by increase of the optical density at 360 nm. The optical density at the end of incubation of isolated insulin was taken for 100%. Aggregation of insulin was measured in the absence of sHsp (dash-dotted lines) or in the presence of the wild type sHsp (solid lines) or their Cys-mutants (dashed lines). The weight ratio sHsp/rhodanese was equal to 1/2.
