# Supplementary material
Source: PubMed Central journal article supplement (PMC3082641)
Supplement: 12192_2009_151_MOESM4_ESM.pdf [file 12192_2009_151_MOESM4_ESM.pdf]

# The pivotal role of the $\beta 7$ strand in the intersubunit contacts of different human small heat shock proteins

## Cell Stress and Chaperones

Evgeny V. Mymrikov, Olesya V. Bukach, Alim S. Seit-Nebi and Nikolai B. Gusev

Corresponding author: Nikolai B. Gusev, Department of Biochemistry, School of Biology, Moscow State University, Moscow 119991, Russian Federation  
Tel/Fax 7-495-939-2747; E-mail NBGusev@mail. Ru

Online Resource 4

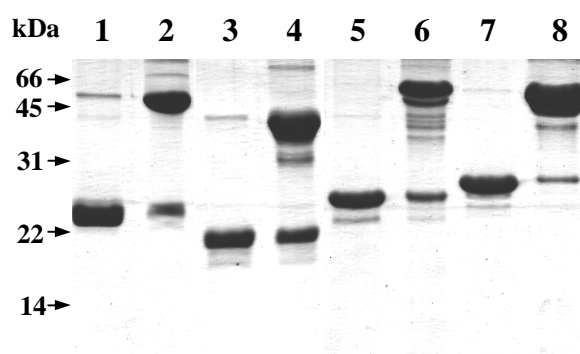

Disulfide crosslinking of Cys-mutants of  $\alpha B$ -crystallin (lanes 1, 2), HspB6 (lanes 3, 4), HspB8 (lanes 5, 6) and of the wild type HspB1 (lanes 7, 8). Reduced samples of proteins were loaded on uneven lanes and the samples of proteins after overnight dialysis under non-reducing condition at 37° C were loaded on even lanes. The positions of molecular mass standards (in kDa) are indicated by arrows.
