# Supplementary material
Source: PubMed Central journal article supplement (PMC3082641)
Supplement: 12192_2009_151_MOESM5_ESM.pdf [file 12192_2009_151_MOESM5_ESM.pdf]

# The pivotal role of the $\beta$ 7 strand in the intersubunit contacts of different human small heat shock proteins

## Cell Stress and Chaperones

Evgeny V. Mymrikov, Olesya V. Bukach, Alim S. Seit-Nebi and Nikolai B. Gusev

Corresponding author: Nikolai B. Gusev, Department of Biochemistry, School of Biology, Moscow State University, Moscow 119991, Russian Federation  
Tel/Fax 7-495-939-2747; E-mail NBGusev@mail.ru

Online Resource 5

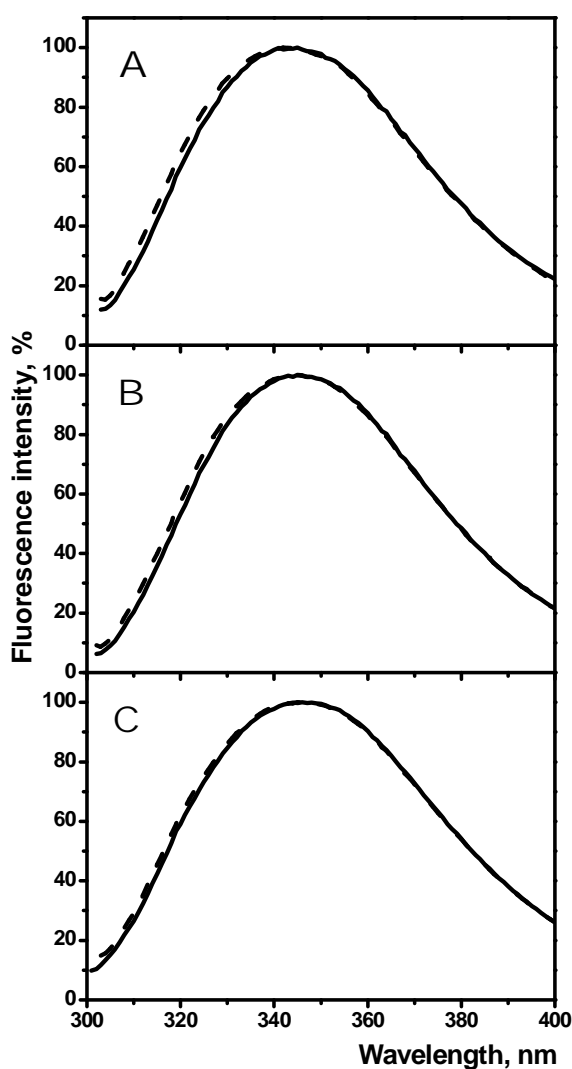

Normalized fluorescence spectra of reduced (solid lines) and oxidized (dashed lines) Cys-mutants of  $\alpha$ B-crystallin (**A**), HspB6 (**B**) and HspB8 (**C**). The fluorescence was excited at 295 nm and recorded in the range 300-400 nm. The data presented are the average of triplicate measurements with at least two different protein samples.
